# Supplementary material
Source: PubMed Central journal article supplement (PMC2776421)
Supplement: 0908351106_0908351106SI.pdf [file 0908351106_0908351106SI.pdf]

# Supporting Information

Waanders et al. 10.1073/pnas.0908351106

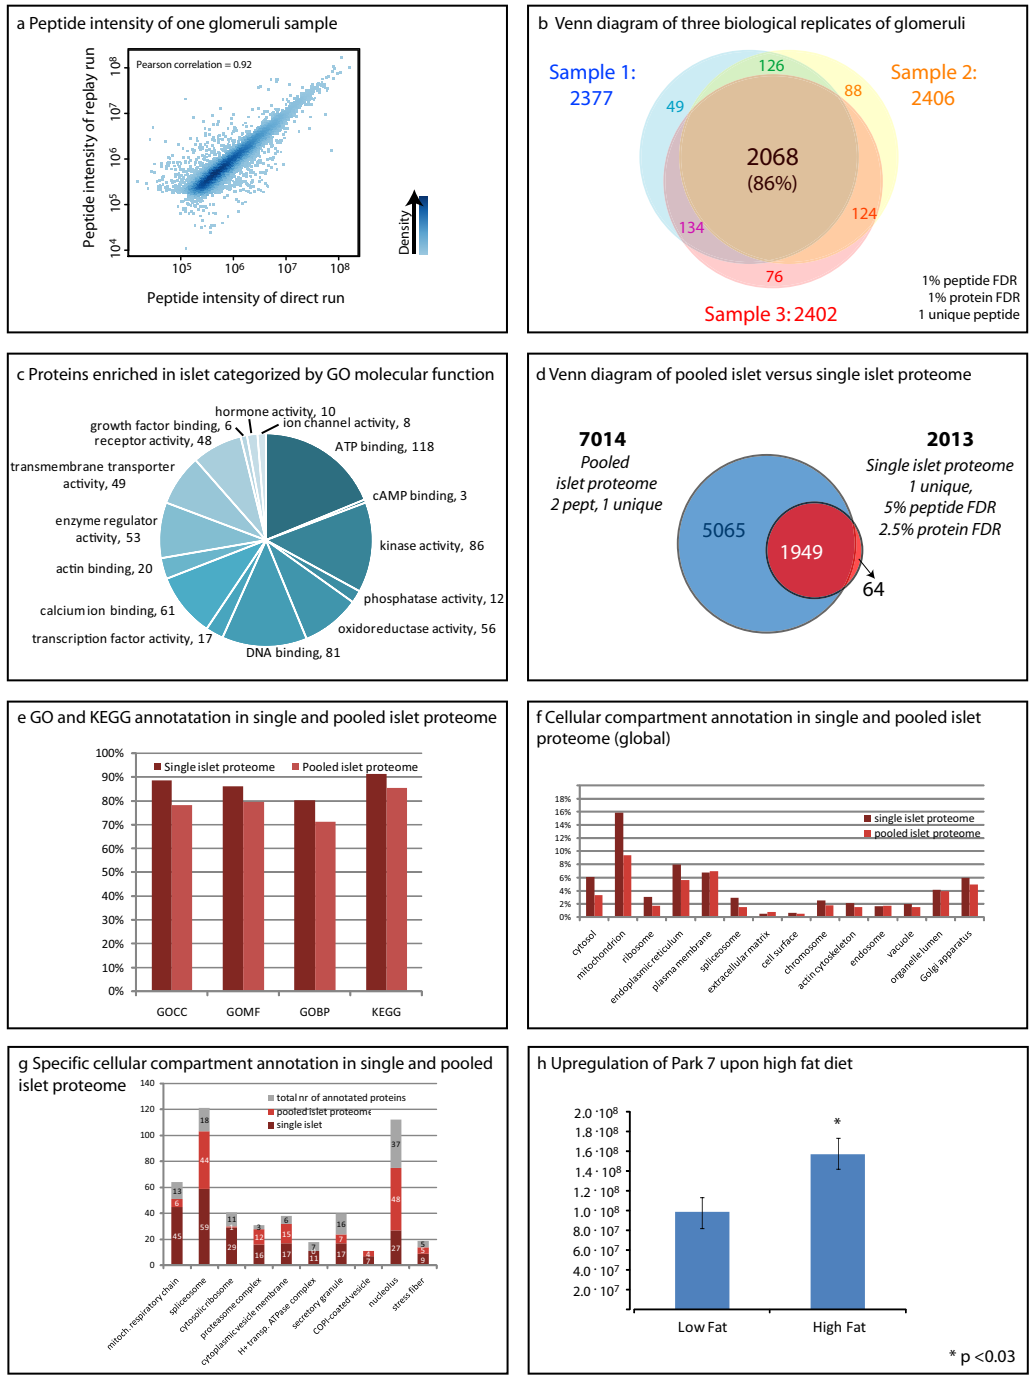

**Fig. S1.** Fig. S1 as part of Waanders et al. (A) Peptide intensity correlation between direct and replay runs (technical replicates) of a glomeruli sample collected by LCM. Pearson correlation coefficient,  $R = 0.90$ . (B) Venn diagram of proteins identified in three individually collected glomeruli samples (biological replicates). (C) Annotation of pooled islet dataset by gene ontology-molecular function. (D) Venn diagram of pooled islet proteome versus proteins identified in single islets, showing 97% overlap. (E) Percentage of identified proteins in single and pooled islet proteome annotated for gene ontology and KEGG. (F) Comparison of proteins of different cellular compartments identified in single versus pooled islet proteome. (G) Annotation of proteins in single and pooled islet dataset to gene ontology identifiers (cellular compartmentalization) involved in  $\beta$  cell function. (H) Up-regulation of Park-7 (DJ-1) upon high-fat diet. Average of two (high-fat) and three (low-fat) experiments, per sample two mice pooled. Mean value  $\pm$  SEM.

## Other Supporting Information Files

[Table S1 \(XLS\)](#)

[Table S2 \(XLS\)](#)

[Table S3 \(XLS\)](#)

[Table S4 \(XLS\)](#)
